# Supplementary material for: Computed Tomography Findings Associated with Treatment Failure after Antibiotic Therapy for Acute Appendicitis
Source: PubMed Central journal article supplement — Korean J Radiol. 2020 Aug 11;22(1):63–71. doi: 10.3348/kjr.2019.0823 (PMC7772384; doi:10.3348/kjr.2019.0823), 2020-08-11
Supplement: kjr-22-63-s001.pdf [file kjr-22-63-s001.pdf]

**Supplementary Table 1. Clinical Outcomes in Treatment Failure Group**

|                       | Resistance to Antibiotics* | Recurrent Appendicitis <sup>†</sup> |
|-----------------------|----------------------------|-------------------------------------|
| Number of patients    | 5                          | 17                                  |
| Pathology             |                            |                                     |
| Suppurative           | 4                          | 12                                  |
| Gangrenous            | 0                          | 1                                   |
| Perforated            | 1                          | 1                                   |
| Chronic               | 0                          | 1                                   |
| Re-antibiotic therapy | NA                         | 2                                   |

\*In the 1 month after antibiotic therapy, 5 patients did not respond to antibiotics and they underwent subsequent surgery,

<sup>†</sup>After 1 month after antibiotic therapy, the patients experienced recurrent symptoms and confirmed recurrent appendicitis by CT or ultrasound. NA = not applicable
