# Supplementary material for: Computed Tomography Findings Associated with Treatment Failure after Antibiotic Therapy for Acute Appendicitis
Source: PubMed Central journal article supplement — Korean J Radiol. 2020 Aug 11;22(1):63–71. doi: 10.3348/kjr.2019.0823 (PMC7772384; doi:10.3348/kjr.2019.0823), 2020-08-11
Supplement: kjr-22-63-s002.pdf [file kjr-22-63-s002.pdf]

**Supplementary Table 2. Interobserver Agreement for CT Findings**

| CT Findings                                | Reader 1          | Reader 2          | Interobserver Agreement (95% CI)* |
|--------------------------------------------|-------------------|-------------------|-----------------------------------|
| Location                                   |                   |                   | 0.876 (0.708–1.000)               |
| Peritoneal                                 | 76 (88.4)         | 78 (90.7)         |                                   |
| Retroperitoneal                            | 10 (11.6)         | 8 (9.3)           |                                   |
| Involved extent                            |                   |                   | 0.623 (0.372–0.875)               |
| Focal                                      | 8 (9.3)           | 13 (15.1)         |                                   |
| Diffuse                                    | 78 (90.7)         | 73 (84.9)         |                                   |
| Maximal diameter of appendix (mm)          | 9.03 (8.04–11.02) | 9.31 (8.16–10.53) | 0.881 (0.818–0.923)               |
| Maximal thickness of appendiceal wall (mm) | 2.55 (1.83–3.40)  | 2.56 (1.80–3.30)  | 0.878 (0.812–0.920)               |
| Appendiceal wall enhancement               |                   |                   | 0.659 (0.441–0.877)               |
| Iso- or hyperenhancement                   | 71 (82.6)         | 73 (84.9)         |                                   |
| Hypoenhancement                            | 15 (17.4)         | 13 (15.1)         |                                   |
| Periappendiceal fat infiltration           |                   |                   | 0.873 (0.765–0.981)               |
| No or only perceptible stranding           | 55 (64.0)         | 56 (65.1)         |                                   |
| Confined to or beyond mesoappendix         | 31 (36.0)         | 30 (34.9)         |                                   |
| Focal wall defect                          | 25 (29.1)         | 22 (25.6)         | 0.445 (0.234–0.655)               |
| Appendicolith                              | 11 (13.3)         | 16 (19.3)         | 0.780 (0.598–0.962)               |
| Intraluminal air                           | 17 (19.8)         | 17 (19.8)         | 0.927 (0.826–1.000)               |
| Periappendiceal fluid                      | 3 (3.5)           | 8 (9.3)           | 0.521 (0.164–0.879)               |
| Adjacent small bowel ileus                 | 26 (30.2)         | 26 (30.2)         | 0.835 (0.707–0.962)               |
| Apical thickening of cecum                 | 47 (54.7)         | 40 (46.5)         | 0.746 (0.607–0.884)               |
| Terminal ileal wall thickening             | 10 (11.6)         | 14 (16.3)         | 0.711 (0.495–0.927)               |
| Lymadenopathy                              | 29 (33.7)         | 24 (27.9)         | 0.756 (0.606–0.905)               |

Data are given as number (%) or median (interquartile range). \*Intraclass correlation coefficient for continuous data, Cohen's kappa for categorical data. CI = confidence interval
